# Supplementary material
Source: Springer Nature journal article supplement (http://www.springermedizin.de/resource/supplementary/12876_2012_869_MOESM6_ESM.pdf/9437952)

# HCC+PBMCs coculture

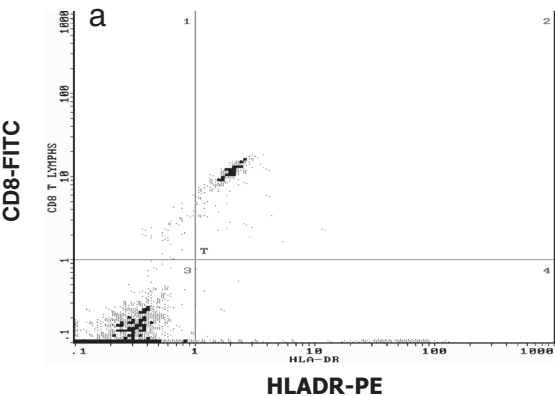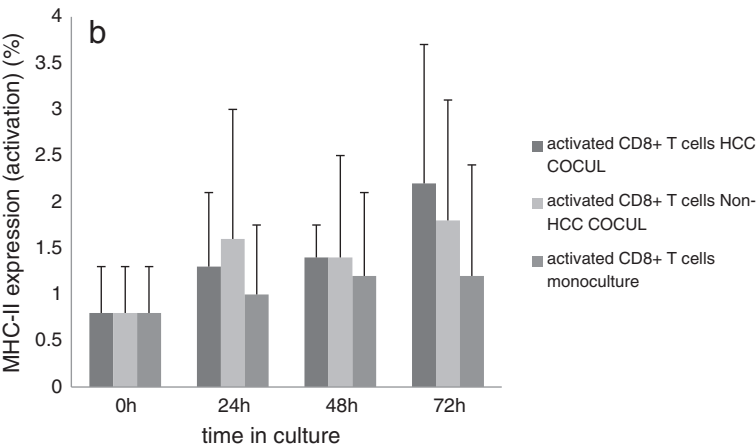

Supplement: MOESM6 [file 9437952]
